# Supplementary material for: Effect of exercise based interventions on sleep and circadian rhythm in cancer survivors—a systematic review and meta-analysis
Source: PeerJ journal article supplement (doi:10.7717/peerj.17053), 2024-03-08
Supplement: Aerobic_exercise_studies.pdf [file Aerobic_exercise_studies.pdf]

|                  | Random sequence generation (selection bias) | Allocation concealment (selection bias) | Blinding of participants and personnel (performance bias) | Blinding of outcome assessment (detection bias) | Incomplete outcome data (attrition bias) | Selective reporting (reporting bias) | Other bias |
|------------------|---------------------------------------------|-----------------------------------------|-----------------------------------------------------------|-------------------------------------------------|------------------------------------------|--------------------------------------|------------|
| Chen 2016        | +                                           | ?                                       | -                                                         | +                                               | +                                        | +                                    | +          |
| Cho 2012         | ?                                           | ?                                       | ?                                                         | +                                               | +                                        | +                                    | +          |
| Courneya 2012    | +                                           | +                                       | ?                                                         | +                                               | +                                        | +                                    | +          |
| Dodd 2010        | +                                           | ?                                       | -                                                         | +                                               | +                                        | +                                    | +          |
| Khoirunnisa 2019 | ?                                           | ?                                       | ?                                                         | +                                               | +                                        | +                                    | +          |
| Mercier 2018     | +                                           | +                                       | ?                                                         | +                                               | +                                        | +                                    | -          |
| Naraphong 2015   | ?                                           | ?                                       | +                                                         | +                                               | +                                        | +                                    | +          |
| Payne 2008       | ?                                           | ?                                       | ?                                                         | +                                               | +                                        | +                                    | -          |
| Roveda 2017      | ?                                           | ?                                       | ?                                                         | +                                               | +                                        | +                                    | +          |
| Tang 2010        | +                                           | ?                                       | ?                                                         | +                                               | +                                        | +                                    | -          |
| Wang 2011        | ?                                           | ?                                       | ?                                                         | +                                               | -                                        | +                                    | +          |
| Wenzel 2013      | ?                                           | ?                                       | ?                                                         | +                                               | +                                        | +                                    | +          |

**S-1a** Risk of bias of aerobic exercise studies
