# Supplementary material for: Effect of exercise based interventions on sleep and circadian rhythm in cancer survivors—a systematic review and meta-analysis
Source: PeerJ journal article supplement (doi:10.7717/peerj.17053), 2024-03-08
Supplement: Exercise_studies.pdf [file Exercise_studies.pdf]

|               | Random sequence generation (selection bias) | Allocation concealment (selection bias) | Blinding of participants and personnel (performance bias) | Blinding of outcome assessment (detection bias) | Incomplete outcome data (attrition bias) | Selective reporting (reporting bias) | Other bias |
|---------------|---------------------------------------------|-----------------------------------------|-----------------------------------------------------------|-------------------------------------------------|------------------------------------------|--------------------------------------|------------|
| Chivelle 2014 | +                                           | +                                       | -                                                         | +                                               | +                                        | +                                    | +          |
| Coleman 2012  | +                                           | ?                                       | ?                                                         | +                                               | +                                        | +                                    | +          |
| Courneya 2014 | +                                           | +                                       | ?                                                         | +                                               | +                                        | +                                    | +          |
| Kamshoff 2015 | +                                           | +                                       | -                                                         | +                                               | +                                        | +                                    | +          |
| Rogers 2015   | +                                           | +                                       | ?                                                         | +                                               | +                                        | +                                    | +          |
| Sprod 2010    | +                                           | ?                                       | ?                                                         | +                                               | +                                        | +                                    | +          |

**S-1c** Risk of bias of combined exercise studies
