# Supplementary material for: Effect of exercise based interventions on sleep and circadian rhythm in cancer survivors—a systematic review and meta-analysis
Source: PeerJ journal article supplement (doi:10.7717/peerj.17053), 2024-03-08
Supplement: Resistance_exercise_studies.pdf [file Resistance_exercise_studies.pdf]

|                 |                                             |                                         |                                                           |                                                 |                                          |                                      |            |
|-----------------|---------------------------------------------|-----------------------------------------|-----------------------------------------------------------|-------------------------------------------------|------------------------------------------|--------------------------------------|------------|
| Steinndorf 2017 | ?                                           | ?                                       | ?                                                         | +                                               | +                                        | +                                    | +          |
|                 | Random sequence generation (selection bias) | Allocation concealment (selection bias) | Blinding of participants and personnel (performance bias) | Blinding of outcome assessment (detection bias) | Incomplete outcome data (attrition bias) | Selective reporting (reporting bias) | Other bias |

**S-1b** Risk of bias of resistance exercise studies
