# Supplementary material for: Effect of exercise based interventions on sleep and circadian rhythm in cancer survivors—a systematic review and meta-analysis
Source: PeerJ. 2024 Mar 8;12:e17053. doi: 10.7717/peerj.17053 (PMC10926908; doi:10.7717/peerj.17053)
Supplement: Supplemental Information 1 [file peerj-12-17053-s001.xlsx]

## Sheet: Sheet1
Title	Author	Year of publication	Journal	Aims	Study population		sample size	Study design	Method of randomization	Allocation	Adjuvant therapy	study duration	Intervention duration	intervention type and details	Exercise prescription				Comparator agent	Comparator Details	outcome measures	Type of data (of the outcome measure)	Results	Results (statistics)								Adverse events	Key findings /Miscellaneous	Limitations	Risk of bias
					Type/stage of cancer	Demographics (Age/gender)									Frequency of exercise/ week	Intensity details	Duration per session	Intervention type (Type of exercise)						Intervention- Mean (SD) pre and post		control group- Mean (SD) pre and post		control group 2 mean (SD) pre and post		P value	CI				Random sequence generation	Allocation concealment	Blinding of participants & personnel	Blinding of outcome assessment	Incomplete outcome data	Selective reporting	Other bias	Overall score (H / UC / L)
YOGA ARTICLES
Psychological adjustment and sleep quality in a randomized trial of the effects of a Tibetan yoga intervention in patients with lymphoma	Cohen	2004	Cancer journal	to study the effect of tibetian yoga on psychologic adjustment and levels of fatigue and sleep disturbances during and after the intervention	lymphoma/ all stages	>18years/ not mentioned	19(TY)+ 19(WL)	RCT	sequential minimization	it was concealed by relevant information entered in a computer program and patients got calls informing regarding the session	cyclophosphamide, doxorubicin, vincristine, and prednisone	3months	7 weeks	1) controlled breathing and visualization 2)mindfulness 3)postures from the Tsa lung 4) preliminary set of postures from the Trul khor (instructed and audiotape given)	1 session/week	_	_	Tibetian yoga (TY)	Wait list	no contact with the researcher until 3months	Pittsburgh Sleep Quality Index [PSQI]	quantitative - discrete	During follow-up, the TY group had significantly better overall sleep quality and that they perceived better sleep quality, fell asleep more quickly, slept longer and used fewer sleep medications compared with patients in the control group	6.5 (5.0)	5.8 (2.3)	7.2 (4.7)	8.1 (2.4)	_	_	0.004	minus 3.8 to minus 0.8	not reported	most of patients attended >50% of sessions. Patients also indicated that they found the program useful, and >80% said they practiced some aspect of the program at least once perweek during the 3-month follow-up.	since the interventon had various aspects, they couldn’t conclude which aspect helped in improving sleep outocme	low risk	low risk	low risk	low risk	low risk	low risk	low risk
Effects of a Yoga Program on Cortisol Rhythm and Mood States in Early Breast Cancer Patients Undergoing Adjuvant Radiotherapy: A Randomized Controlled Trial	Raghavendra	2009	Integrative Cancer Therapies	to compare the effects of an integrated yoga program with brief supportive therapy in breast cancer outpa tients undergoing adjuvant radiotherapy at a cancer center.	breast/ stage 2 and 3	30-70years/0M +88F	44(yoga) + 44(supportive counnselling)	RCT	computer-generated random numbers	in sealed envelopes	Chemotherapy and radiotherapy	6weeks	6weeks	1) set of asanas (postures done with awareness), 2) breathing exercises, 3)pranayama (voluntarily regulated nostril breathing), 4)meditation, 5) yogic relaxation techniques with imagery	3 sessions per week	_	60min	Yoga	supportive counselling	3-4 counselling sessions aiming at education, reinforcing social support, and coping preparation.	salivary cortisol	quantitative - continuous	significant decrease in mean salivary cortisol levels at 6 a.m. (t = 4.21, P < .001) and pooled diurnal mean cortisol in the yoga group (t = 2.79, P = .01) but not in the control group (t = 0.34, P <.74, and t = –0.04, P = .96). significant decrease in mean salivary cortisol level at 6 a.m. in the yoga group compared with the control group (F1, 56 = 7.45, P = .009). There was also a significant d…	0.25 (0.13)	0.19 (0.13)*	0.25 (0.21)	0.25 (0.18)	_	_	p <0.05 post yoga	_	not reported		inequality in contact duration of interventions and with 6 weeks duration, they were not able to assess the chronic long-term effects of these interventions on cortisol rhythms	low risk	low risk	unclear	unclear	low risk	low risk	low risk
Multicenter, Randomized Controlled Trial of Yoga for Sleep Quality Among Cancer Survivors	Mustain	2013	Journal of clinical oncology	to determine the efficacy of a standardized yoga intervention compared with standard care for improving global sleep quality (primary outcome) among post-treatment cancer survivors.	mixed/all	54(0.51) /393F+ 17M	206(yoga)+ 204 (SC)	RCT	computer-generated random numbers table in blocks of two	website generated emails	209 were on current hormone therapy	4 weeks	4 weeks	1)standard sitting and standing sequences, 2)transitions 3)restorative yoga, 4) mudras, 5) pranayama, 6) mindfulness meditation and 7)visualiztaion	twice a week	_	75min	YOCAS	standard care	standard follow up and were offered YOCAS after the study	Pittsburgh Sleep Quality Index (PSQI) and Actigraphy	quantitative- discreet and continuous	PSQI-Yoga group demonstrated significantly greater improvements in the primary outcome of global sleep quality (P<.01) and characteristics that define global sleep quality (secondary outcomes) including daytime dysfunction (P<.01), subjective sleep quality (P _x0003_<.05), and sleep medication use (P <.05)at postintervention compared with control participants. Actigraphy- Yoga participants showed…	9.20 (0.25)	7.23 (0.26)	8.96 (0.28)	7.89 (0.26)	_	_	0.005	_	supraventricular tachycardia, considered grade 2 and unrelated to the study intervention— during the study period	Intensity of the yoga was monitored by using the American College of Sports Medicine Rating of Perceived Exertion Scale	The study did not control for components such as time or attention because this would have required the use of placebo yoga intervention for the YOCAS program; however, no validated approach for placebo-controlled yoga interventions exists. The results are not generalizable to all types of yoga as the majority were female, white, married, well-educated breast cancer survivors, limiting generaliza…	low risk	low risk	low risk	low risk	low risk	low risk	low risk
Randomized, controlled trial of yoga in women with breast cancer undergoing radiotherapy	Chandwani	2014	Journal of clinical oncology	incorporating yoga (YG) into radiotherapy (XRT) for women with breast cancer finds improved quality of life (QOL). However, shortcomings in this research limit the findings.	breast/ stage 0 to 3	26-79years/0M + 178F	53 (Yoga) + 56 (Stretch) + 54 (waitlist)	RCT	adaptive randomization according to age, stage of disease, time since diagnosis, type of surgery, and chemotherapy	_	104 on chemotherapy	6 months	6 weeks	postures, or asana (forward-, backward-, and side-bending asanas in sitting and standing position, cobra posture, crocodile, and half-shoulder-stand with support); (3) deep relaxation (supine posture); (4) alternate-nostril breathing, or pranayama; and (5) meditation	3 sessions/week	_	60min	yoga	stretch and waitlist	The ST program included exercises recommended specifically for women undergoing or recovering from breast cancer treatment.21,22 The exercises included standing, lying down, and sitting positions and approximated the gross movements of the YG exercises (eg, horizontal arm stretch, breast stroke, neck stretch, quarterback throwing a football).	Pittsburgh Sleep Quality Index (PSQI) and salivary cortisol levels	quantitative- discreet and continuous	There were no significant group differ ences at any time point for PSQI. Cortisol- GLM analysis of cortisol slopes, covarying for baseline, revealed a group main effect at the end of treatment (adjusted means: YG _x0004_0.104, SE 0.011; ST _x0004_0.072, SE 0.009; WL _x0004_0.064, SE 0.010; P _x0002_.02), with theYG group having a significantly steeper slope than theST and WL groups (P_x0002_.023 …	PSQI- 8.3 (0.6) cortisol slope- no group difference	1 month PSQI-7.0 (0.6) cortisol- 0.104 (0.011)	PSQI- Stretch-8.5 (0.5) WL- 8.2 (0.5)	1 month PSQI stretch-7.7(0.7) WL- 5.8 (0.6) cortisol- ST-0.073 (0.010) WL- 0.073 (0,010)	_	_	PSQI - >0.05	_	not reported			low risk	unclear risk	high risk	low risk	low risk	low risk	low risk
A Restorative Yoga Intervention for African-American Breast Cancer Survivors: a Pilot Study	Taylor	2018	Support Care Cancer	(1) measure changes in study outcomes in a restorative yoga (RY) group compared to a wait list control group, (2) assess adherence to the RY program, and (3) assess program satisfaction among study participants	breast/ no stage mentioned	18-65years/ 0M+26 F)	14 (yoga) + 12 (control group)	pilot RCT	not mentioned	opaque envelopes	completed treatment except hormone therapy	8 weeks	8 weeks	(1) 10 min of controlled breathing exercises (Pranayama) in a comfortable cross-legged seated position, (2) 5 min of meditation in a comfortable cross-legged seated position, (3) 50 min of 13 restorative yoga postures of active relaxation, and (4) 10 min of deep relaxation in savasana	1 session/week	_	75min	restorative yoga	waitlist control	instructed to maintain their current daily activities and not participate in yoga until the 8-week study period	insomnia severity index (ISI)	quantitative- discreet	There were no significant group differences on sleep quality	10.18 (8.74)	7.89 (7.17)	7.56 (6.82)	6.20 (7.11)	_	_	0.89		not reported		the small sample size limits statistical power, lesser intervention frequency, use of subjectve outcome measures	unclear risk	low risk	low risk	low risk	low risk	low risk	high risk
Randomized trial of Tibetan yoga in patients with breast cancer undergoing chemotherapy	Chaoul	2018	cancer	to examine the effects of a Tibetan yoga program (TYP) versus a stretching program (STP) and usual care (UC) on sleep and fatigue in women with breast cancer who were undergoing chemotherapy	breast/ 1 to 3 stage	>18years ( 0M + 227 F)	74 (TYP) +68 (STP) + 85(UC)	RCT	adaptive randomization, minimization with specific randomization factors	_	chemotherapy	12 months	7 weeks	1) mindfulness and focused attention through guided meditation with breathing and visualization; 2) an alternate nostril breathing practice (9 breathings of purification) and a breath retention exercise 3) Tsa Lung movements; and 4) closing with a brief compassion-based meditation.	4 supervised sessions during chemotherapy, and 3 booster sessions over the subsequent 6 months, and were encouraged to practice at home 7days/week	_	75-90min	Tibetian yoga program (TYP)	Stretching program (STP) and usual care (UC)	STP-exercises included standing, lying down, and sitting positions and approximated the gross movements of the TYP	Pittsburg sleep quality index (PSQI) + actigraphy	Quantitative- discreet and continuous	There were no group differences noted in total sleep disturbances over time. However, patients in the TYP group reported fewer daily disturbances 1 week after treatment compared with those in the STP [P=.03] and UC [P=.02]. Actigraphy data revealed greater minutes WASO for patients in the STP group 1 week after treatment versus those in the TYP [P=.0003]) and UC [P=.0002] . Patients in the TYP gr…	PSQI- 7.8 (3.7) Actigraphy- SE- 81.2 (6.7) OL-34.4 (22.2) TST- 7.2 (0.8) WAS0-44.0 (25.4)	PSQI- 6.3 (4.1) Actigraphy SE- 81.6 (5.5) OL- 40.0 (26.4) TST- 7.3 (0.8) WAS0- 39.9 (8.9)	STP PSQI-8.5 (3.9) Actigraphy- SE- 80.7 (6.6) OL- 29.5 (17.9) TST- 7.1 (1.1) WAS0- 48.4 (17.1)	STP PSQI 6.5 (3.4) Actigraphy SE- 82.0 (4.9) OL- 31.8 (20.2) TST- 7.3 (1.1) WAS0- 45.5 (15.7)	UC PSQI- 8.1 (4.2) Actigraphy- SE- 81.4 (6.1) OL- 32.9 (19.2) TST- 7.1 (1.1) WASO- 48.8 (21.2)	UC PSQI- 6.1 (3.9) Actigraphy- SE- 83.3 (3.8) OL- 34.1(18.0) TST- 7.2 (0.9) WASO- 44.6(16.3)			no adverse events	patients completed maximu of 4 sessions	1.22% of patients dropped out of the study. 2.High rate of attrition resulted in the trial being underpowered. 3. single center study 4. no blinding in group assignment	low risk	unclear risk	high risk	low risk	low risk	low risk	low risk			0
Influence of Yoga on Cancer-Related Fatigue and on Mediational Relationships Between Changes in Sleep and Cancer-Related Fatigue: A Nationwide, Multicenter Randomized Controlled Trial of Yoga in Cancer Survivors	Lin	2019	Integrative Cancer Therapies	to examine the effect of a standardized, 4-week, YOCAS program on CRF and changes in sleep among survivors.	mixed/ all	>21years (14M +344F)	177 (YOCAS) + 181 (SCS)	RCT	computer-generated random numbers table (blocks of 2, allocation ratio of 1:1)	Via email generated by computer	completed treatment	4 weeks	4 weeks	breathing exercises, physical alignment postures, and mindfulness exercises	2 sessions/week	moderate intensity	75min	YOCAS	standard cancer survivorship care (SCS)	continued with follow-up care from their oncologists and primary care providers	Pittsburgh Sleep Quality Index (PSQI)	quantitative- discreet	results controlling for pre-intervention levels, showed that participants in the YOCAS intervention, compared with those receiving standard survivorship care, demonstrated significantly greater improvements in overall sleep quality (−0.8 ± 0.3, P < .01), subjective sleep quality(−0.1 ± 0.1, P = .05), and daytime dysfunction (−0.2 ± 0.1, P< .01) at post-intervention. YOCAS participants also demons…	Overall PSQI −0.8 ± 0.3 between group difference				_	_	<.01	−0.24 (−0.41 to −0.06)	no adverse events		(1)The majority of study participants were highly educated white female breast cancers survivors, thereby limiting the generalizability of the results. (2) The study design did not compare yoga with an active behavioral placebo controlling for specific and nonspecific characteristics. Therefore, we cant assess whether the improvements in daytime dysfunction were specific to yoga. (3) No biophysio…	low risk	low risk	low risk	low risk	low risk	low risk	low risk
Online yoga in myeloproliferative neoplasm patients: results of a randomized pilot trial to inform future research	Huberty	2019	BMC Complementary and Alternative Medicine	(1) explore the limited efficacy (does the program show promise of success) of a 12-week online yoga intervention among MPN patients on symptom burden and quality of life and (2) determine feasibility	Myeloproliferative neoplasm (thrombocythemia, polycythemia vera, or myelofibrosis)	>18years (3M + 45 F)	27 (yoga) + 21 (control)	pilot RCT	using a website	_	_	16 weeks	12 weeks	Weeks 1–2 were based on brief introductory videos (5–20 min) demonstrating fundamental yoga poses and safe practice guidelines. Weeks 3–12 gradually increased to longer duration videos (20–30 min) with slightly increased intensity. All videos include warm-up and cool down, reminders for breathing with the movements/poses, and a closing mindfulness activity with a message from yoga instructor, bri…	_	_	5-30min/session 60min/week	yoga	waitlist control	instructed to maintain their usual activity for 16 weeks	Sleep Disturbance Short Form 8a	quantitative- discreet	There were small effects of the yoga intervention observed for sleep disturbances (d = − 0.26 to − 0.61)	50.1 (6.2)	−3.8 (7.6) change from basline	48.8 (6.7)	−2.1 (5.0)	_	_			no adverse events		1. study had female population majorly 2. there was no control over confounding factors such as medications 3. the follow up period was restricted to 4 weeks	unclear risk	unclear risk	high risk	low risk	low risk	low risk	low risk
EXERCISE ARTICLES
Effect of exercise on biomarkers, fatigue, sleep disturbances, and depressive symptoms in older women with breast cancer receiving hormonal therapy	Payne	2008	Oncology Nursing Forum	To compare the effectiveness of a prescribed home-based walking exercise intervention with usual care in older women receiving hormonal treatment for breast cancer, and to examine relationships among levels of the cortisol, serotonin, interleukin-6, and bilirubin biomarkers and fatigue, sleep disturbances, and depressive symptoms.	Breast /	>55years (0m +20 F)		pilot -Longitudinal randomized clinical trial.	not mentioned	_	hormonal therapy with tamoxifen, anastrozole, or letrozole	14 weeks	14 weeks	participants were given pedometer and taught how to use it. Logs were provided to study participants to record the frequency and length of their walking activity.	4 times/week	moderate	20 min/session	home based walking program	control	were given gift card	Pittsburgh Sleep Quality Index (PSQI) and sleep watch actigraphs Biomarkers- cortisol, seratonin, IL6 and bilirubin	quantitative- discrete and continuous	Effect of the exercise intervention on sleep scores was highly significant between groups. Exercise group scores on the PSQI decreased significantly over time (indicating improved sleep quality), although scores did not change significantly within the control group. Sleep actigraphy also showed significantly shorter actual wake time and less movement in the exercise group. Serotonin levels also w…	? Reported as graph								not reported		1. small sample size and subsequent limited power and that participants in the intervention group may have received more attention than those in the usual care group. 2. The study relied on self-report measures of exercise;therefore, the authors were unable to verify actual adherence to study parameters, such as the number of times per week that subjects actually completed the 20-minute walk.	unclear risk	unclear risk	unclear risk	low risk	low risk	low risk	high risk
A Randomized Controlled Trial of Home-Based Exercise for Cancer-Related Fatigue in Women During and After Chemotherapy With or Without Radiation Therapy	Dodd	2010	Cancer Nurs.	to evaluate the effectiveness of a home-based exercise training intervention, the PRO-SELF FATIGUE CONTROL PROGRAM on the management of cancer related fatigue.	breast, colorectal, or ovarian cancer	>18years (0M +119 F)	44 (EE) + 36 (CE) + 39 (CC)	A randomized, single blind, three-arm, controlled trial design	stratified random sampling based on type of cancer	_	chemotherapy	1year	?not mentioned	exercise prescription was comprehensive and individualized to the participant’s fitness level, based on the baseline exercise treadmill test. The exercise prescription was adjusted by exercise physiologist through weekly follow up phone calls to maintain the exercise prescription. participants were taught to monitor HR and Borg scale	3–5 times per week	moderate (training heart rate corresponding to 60– 80% VO2peak)	20–30 min/session	cardiovascular/aerobic exercise e.g. walking, jogging, or bicycling	standard care	telephoned weekly by the research nurse to inquire about their health and general response to cancer treatment.	General Sleep Disturbance Scale (GSDS)	quantitative- discrete	A significant quadratic effect for the trajectory of sleep disturbance was found (p-0.043), but no group differences were detected over time.	? Reported as graph						p-0.043	_	hip pain, sciatica, arm, kne, ankle and foot discomfort and asymptomatic ischemic electrocardiogram changes were reported	The EE group was given this exercise prescription at T1, and the CE group was given this exercise prescription at T2. The participants were supported in their exercise through weekly telephone calls from the exercise trainers who provided support and encouragement as well as help in problem solving potential barriers to exercise.	1. only self-report of exercise behaviors were obtained	low risk	unclear risk	high risk	low risk	low risk	low risk	low risk
Improving sleep quality for cancer patients: benefits of a home-based exercise intervention	Tang	2010	Support Care Cancer	To determine the effect of a home-based walking exercise program on the sleep quality and quality of life of cancer patients, 2) to determine if enhanced sleep quality was associated with improvement in quality of life over time	mixed/ not mentioned	>18years (17M +54 F)	37 (EG) + 35 (CG)	prospective, longitudinal, two-armed, randomized clinical trial	table of random numbers	_	chemotherapy/ radiotherapy/ hormonal/ completed treatment	2months	8 weeks	patients were adviced brisk walk in the evening (4-6pm)and received a diary to record the duration of the walk, the RPE, comments or difficulties during each bout of walking. Every 2 weeks, diaries were returned to the researcher. Patients were instructed to start with a 5-min warm-up (walking slowly) and to finish with a 5-min cooldown after completing the 30-min walk.	3days/week	moderate RPE- 11-13	30min/session	Brisk walking	standard care	asked to maintain their current lifestyle for 8 weeks and were given a diary to record any exercise taken beyond what they would normally do.	Taiwanese version of the PSQI	quantitative- disccreet	The reduction slope of the PSQI global score for the exercise group was significantly larger than that for the control group at 1 and 2 months (both p values<0.001), after adjusting for other confounding variables. Therefore, the walking exercise program significantly improved patient sleep quality	13.42 (2.27)	9.78 (3.06)	13.17(3.11)	13.11 (2.89)	_	_	p <0.005	_	not reported		1. Did not explore the possible confounding effect of light exposure and social contact as zeitgebers that may have promoted sleep by reinforcing the circadian rhythm. 2. Relied only on subjective sleep outcomes 3. Did not assess all physical activities in metabolic equivalent task (MET) hours per week for both groups 4, No follow-up of the control group to determine whether patients began and co…	low risk	unclear risk	unclear risk	low risk	low risk	low risk	high risk
A randomized trial of aerobic exercise and sleep quality in lymphoma patients receiving chemotherapy or no treatments	Courneya	2012	American Association for Cancer Research.	to examine the effect of exercise on sleep quality in patients with lymphoma	Hodgkin lymphoma (HL) or non–Hodgkin lymphoma (NHL),/ no evidence of disease, stage I/II, and III/IV	>18yrs (69M + 48F)	60 (Usual care- UC) + 57 (aerobic exs training-AET)	RCT	computer-generated program	independently generated allocation sequence that was concealed	chemotherapy or off-treatments	12 weeks	12-week	aerobic exs via cycle ergometer Threshold and peak interval training sessions were introduced at weeks 7 and 9, respectively.	3days/week	60-75% of VO2peak (increased from 60% to 5% every week)	15-20min (1st week) to 40-45min (by 9th week) (increase by 5min/week until 45min)	erobic- cycle ergometer	usual care	asked not to increase their exercise from baseline	Pittsburgh Sleep Quality Index (PSQI)	quantitative- discreet	AETresulted in a small (d=_x0002_0.19) nonsignificant (P= 0.16) improvement in global sleep quality compared with UC [mean group difference-0.64; 95% (CI),_x0002_1.56 to +0.27	5.84 (3.58)	4.47 (3.13)	4.15 (3.04)	4.15 (3.19)	_	_	P = 0.167	_x0002_0.64 (_x0002_1.56 to þ0.27)	no serious adverse events reported		1. 25% recruitment rate from a single center 2. The exclusion of the sleep disturbances subcomponent of the PSQI 3. Failure to include an objective sleep measures	low risk	low risk	unclear risk	low risk	low risk	low risk	low risk
Comparisons of Exercise Dose and Symptom Severity Between Exercisers and Nonexercisers in Women During and After Cancer Treatment	Cho	2012	J Pain Symptom Manage.	to describe the characteristics of exercise dose in a sample of women both during and after cancer treatment and to evaluate for differences in symptom severity in exercisers versus nonexercisers, at three time points	breast, colorectal, or ovarian cancer/ stage 1-3	≥ 18 years (0M + 119F)	52 exerciser + 65 non exercisers	longitudinal, randomized controlled trial (RCT)	_	_	chemotherapy	1Year	1 year	group 1 (EE) received their exercise prescription throughout the study period (both during & after cancer treatment) group 2 (CE) received their exercise prescription after having completed cancer treatment exs included- walking, jogging/running, swimming, and cycling	3days/weel	moderate intensity	20min/session	aerobic	usual care	group 3 (CC) received usual care throughout the study period (during and after cancer treatment).	General Sleep Disturbance Scale (GSDS)	quantitative- discreet	no significant difference found in sleep disturbance severity between groups	44.95 (17.93)	44.84 (20.07)	47.49 (20.53)	43.42 (19.42)	_	_	>0.05	_	not reported	The study participants exercised significantly more frequently (P ≤0.019) and longer (P < 0.0005) than the recommended levels (>3times/week, >20min/ssession but less than recommended level regarding intensity (moderate). They exercised significantly less hard at T1 and T2 (P <0.0005) 44-57% were involved in aerobic+yoga	1. self-report of exercise activities 2. Several demographic characteristics were reported as the determinants of physical exercise- reduce generalisability 3. exercise data were collected at only 3 time points over 12 months	unclear risk	unclear risk	unclear risk	low risk	low risk	low risk	low risk
Impact of a home-based walking intervention on outcomes of sleep quality, emotional distress, and fatigue in patients undergoing treatment for solid tumors	Wenzel	2013	the oncologist	to evaluate the impact of a home-based walking intervention during cancer treatment on sleep quality, emotional distress, and fatigue	stage I–III solid malignant tumor	>21years (77M +49F)	126 (68 exercise + 58 control)	RCT	_	_	chemotherapy, radiation, or both	5- 35 weeks	_	Brisk walking participants were asked to wear pedometers daily throughout the whole study period and to record pedometer steps on a daily exercise log.	5days/week	50-70% of Hrmax	20-30min + 5min warm up + 5min cool down	Brisk walking	usual care	Instructed to maintain their usual physical activity;	PSQI	quantitative- discreet	the exercise group participants had worse sleep quality (p_x0001_.015) than usual care group participants at the end of the study.	6.7 (3.9)	5.8 (3.7)	7.7 (4.2)	6.0 (3.5)	_	_	pre- .199 post- 0.015		not reported	If participants were unable to reach this goal, they were instructed to begin with a slower pace of two sessions of 5–10min/dayand gradually progress to a continuous walk. Although the focus of the study is on prescribed walking for the intervention group, some participants performed other aerobic activities (walking, jogging, running, swimming, and biking) as a substitute for or as a supplement …		unclear risk	unclear risk	unclear risk	low risk	low risk	low risk	low risk
Effects of exercise dose and type on sleep quality in breast cancer patients receiving chemotherapy: a multicenter randomized trial	Courneya	2014	Breast Cancer Res Treat	To examine the effects of different doses and types of exercise on sleep quality in breast cancer patients receiving chemotherapy.	breast cancer/ stage I–IIIc	>18years (0M +296 F)	N = 296 (STAN- 95, HIGH- 99, COMB- 102)	multicenter randomized trial	stratified random sampling based on treatment protocol and center by computer generated program	via Edmonton	Chemotherapy	3-4 weeks after chemotherapy	3-4 weeks after chemotherapy		STAN- 3 days/week	_	STAN- 25–30 min/session	aerobic			PSQI	Quantitative- discreet	Compared to a standard volume of aerobic exercise, higher volumes of both aerobic and combined exercise improved some aspects of sleep quality during breast cancer chemotherapy	6.14 (3.91)	7.61 (0.31)	_	_	_	_	COMB versus STAN - 0.085	[+0.11 to -1.62]	not reported		1. 41 % recruitment rate 2. the exclusion of the sleep disturbances component of the PSQI which may have affected the overall validity of the scale 3. failure to include an objective sleep measure.	low risk	low risk	unclear risk	low risk	low risk	low risk	low risk
															HIGH- 3 days/ week	_	HIGH- 50–60 min/session	aerobic						6.23 (4.35)	6.71 (0.31)	_	_	_	_	HIGH versus STAN- 0.039	[-0.05 to -1.76];
															COMB- STAN + strength training program for 3 days/week,	60–75 % of 1 RM	COMB- 50–60 min/ session	10–12 reps of nine different strength exercise						6.22 (4.07)	6.86 (0.30)	_	_	_	_	HIGH versus COMB- 0.74	[?0.71 to -1.00];
Randomized controlled trial of the effects of high intensity and low-to-moderate intensity exercise on physical fitness and fatigue in cancer survivors: results of the Resistance and Endurance exercise After ChemoTherapy (REACT) study	Kampoff	2015	BMC Medicine	to examine the effects of a HI and a low-to-moderate intensity (LMI) resistance and endurance exercise program compared with a wait list control (WLC) group in cancer survivors who had completed primary cancer treatment	breast, colon, ovarian, cervix or testis cancer, or lymphomas/ stage 1-4	≥18 years (77M + 402F)	479 (HI-91, LMI-95, WLC- 91)	RCT	stratified random sampling by cancer type and hospital, generated from statistical software	concealed	completed treatments	12 weeks	12 weeks		2days/week	HI- ≥80 % of HRmax HI LMI- 40-50% of HRmax	_	_	waitlist control	asked to maintain their habitual daily PA pattern	PSQI	quantitative- discreet	No significant between-group differences were found for sleep disturbances	HI 10.3 (3.3)	HI 9.9 (3.3)	LMI 10.9 (3.1)	LMI 10.7 (3.7)	WLC 10.1 (3.2)	WLC 9.9 (3.6)	>0.05	HI vs. WLC −0.2 (−1.0 to 0.6) LMI vs. WLC 0.1 (−0.8 to 0.9) HI vs. LMI −0.2 (−1.1 to 0.6)	No adverse events directly related to the exercise programs were reported.		1. 8 % of the WLC participants engaged in weekly supervised exercise sessions 2. 65 % of the participants were diagnosed with breast cancer and only small groups of other diagnosis were included. 3. slightly higher dropout rates were observed in LMI compared to the other groups.	low risk	low risk	high risk	low risk	low risk	low risk	low risk
Inflammation and psychosocial factors mediate exercise effects on sleep quality in breast cancer survivors: pilot randomized controlled trial	Rogers	2015	Psychooncology	To improve mechanistic understanding, this pilot randomized controlled trial examined mediators of an exercise intervention effects on sleep in breast cancer survivors	breast cancer/ ≤ Stage II	30 to 70 years/ 0M + 42F	42 (20-intervention + 22 control)	RCT	stratified by ductal carcinoma in situ (DCIS) versus Stage I or II and done in blocks of four using computer generated numbers.	opaque envelopes	completed treatments but few were on anti-estrogen agents.	3 months	3 months	Intervention included 160 minutes/week of moderate intensity aerobic walking, twice weekly resistance training (resistance bands), and six discussion groups (to improve adherence).	aerobic- 4days/week resistance- 2days/week	aerobic- moderate intesity resistance- 8 exs* 2 sets * 15 reps	aerobic- 40min/session	aerobic- supervised on site training 2times/week and home based exercise 2times/week resistance- resistant bands	usual care	were asked to avoid changing their exercise behavior during the study when compared with what they were doing at time of study enrollment.	PSQI, Patient Reported Outcomes Measurement Information System (PROMIS) Accelerometer	Quantitative- discreet	No significant between group differences were noted for the remaining PSQI outcomes, PROMIS sleep disturbance, accelerometer efficiency, and accelerometer latency	PSQI- 8.2 (3.4) PROMIS- 49.4 (7.1) accelerometer- latency- 10.3 (10.5) efficency- 82.3 (6.2)	PSQI- 6.7 (3.7) PROMIS- 46.2 (8.0) accelerometer- latency- 7.4 (5.6) efficency- 82.9 (5.7)	PSQI- 9.2 (4.8) PROMIS- 53.4 (9.2) accelerometer- latency- 7.1 (6.8) efficency- 82.4 (8.6)	PSQI- 7.1 (3.2) PROMIS- 51.1 (7.4) accelerometer- latency- 8.9 (6.6) efficency- 84.9 (6.0)	_	_	>0.05		2 in the intervention group (modification of resistance exercise required due to ongoing preexistent lymphedema symptoms and mild hematoma at site of blood draw) and 2 in the control group experienced elevated BP during treadmill fitness test. 2 unrelated non-serious adverse events occurred (both in the intervention group) and included broken wrist due to a motor vehicle accident and new breast l…		1. small sample size 2. inability to differentiate between the effects of exercise distinct from psychosocial effects that may have resulted from our discussion groups and staff support	low risk	low risk	unclear risk	low risk	low risk	low risk	low risk
Effect of walking on circadian rhythms and sleep quality of patients with lung cancer: a randomised controlled trial	Chen	2016	British Journal of Cancer	to investigate (1) the effect of a 12-week walking exercise program in improving subjective and objective sleep quality and stabilising rest-activity rhythms and (2) the moderating effect of rest-activity rhythms on subjective and objective sleep quality among patients with lung cancer.	lung cancer/ all stages	>18 years/ 24M + 32 F	111 (56 walking exs + 55 usual care)	RCT	computer-randomised group assignment	_	on/off treatment	12 weeks	6 months	A 12-week regimen of home-based walking exercises, comprising walking at a moderate intensity for 40 min, 3days/weel, was administered along with weekly exercise counseling.	3days/week	moderate intensity	40min/session	home based walking program	usual care	asked to maintain normal daily activity and not perform additional exercise during the study period.	PSQI + Actigraph	quantitative- discreet + continuous	PSQI (P=0.001) and TST (P=0.023) of the patients in the exercise group significantly improved 3 and 6 months after intervention. The moderating effect of I>O on TST was significant (P=0.032)	PSQI- 9.25 (4.55)	6.49 (3.71)	8.82 (4.26)	8.33 (4.67)			0.001		1. 1 in walking exercise group was hospitalised for shortness of breath & hematuria; nevertheless, the walking exercises were eliminated as the cause. In addition, 2. 1 in the usual-care group was hospitalised for an altered consciousness caused by brain metastasis.		1. not a blind study 2. only a 12 week protocol due to time limit	low risk	unclear risk	high risk	low risk	low risk	low risk	low risk
																								Accelerometer-
																								TST- 380.32 (96.39)	401.76 (72.84)	395.06 (88.21)	369.29 (107.21)			0.023
																								SE- 88.94 (9.67)	88.18 (10.78)	88.36 (10.73)	85.07 (15.38)			0.779
																								SOL- 27.14 (40.48)	22.15 (23.00)	31.85 (30.05)	37.88 (38.05)			0.427
																								WASO- 45.86 (33.17)	52.61 (43.96)	50.56 (45.30)	63.92 (66.42)			0.861
																								r24- 0.42 (0.14)	0.47 (0.15)	0.36 (0.12)	0.41 (0.18)			0.572
																								I<O- 94.68 (7.31)	96.63 (2.98)	92.65 (7.24)	93.45 (8.30)			0.709
Protective Effect of Aerobic PhysicalActivity on Sleep Behavior in Breast Cancer Survivors	Roveda	2017	Integrative Cancer Therapies	to test the effect of 3 months of physical activity on sleep and circadian rhythm activity level evaluated by actigraphy.	breast cancer/ no stage specified	35-70years/ 0M +40F	40 (19 Intervention group + 21 control group)	RCT	?randomised	_	_	3 months	3 months	received recommendation to be PA for at least 30 min/ day and requested to participate in a 3-month active PA program that included 2 sessions of 1-hour brisk walking per week.	2days/week	HRmean - 58% to 73%	30min of PA everyday 30min/session + 10min cool down	Brisk walking	usual care	Received only the WCRF/AICR recommendation to be physically active for at least 30 minutes every day	Accelerometer	quantitative- continuous	The CG showed a deterioration of sleep, whereas the IG showed a stable pattern. In the CG the SE, AST and IT decreased and the AWT, SL, MAS and MFI increased. In the IG, the SE, IT, AWT, SL, and MAS showed no changes and AST and MFI showed a less pronounced change in the IG than in the CG. The rhythmometric analysis revealed a significant circadian rhythm in two groups.	SE-84.4 (4.3)	84.6 (4.9)	85.2 (5.2)	80.7 (6.0)			P < .001		not reported	During the 3 months of the trial program all women, both IG and CG, continued to participate in the DIANA-5 study activities including cooking classes and nutritional advice.	The marked worsening in sleep parameters of CG patients was unexpected and the reasons for this outcome are unclear. It stands to reason that this may be due to seasonal environmental modifications, possibly interacting with the underlying disease of these women. However, since a healthy control group of the same sex and age was not included in our study, the individual contribution of the above-…	unclear risk	unclear risk	unclear risk	low risk	low risk	low risk	low risk
																								AST- 392.6 (42.4)	386.1 (42.2)	402.1 ± 37.5	374.1 ± 40.3			P = .03
																								IT- 88.4 (3.5)	87.1 (4.4)	87.8 (3.6)	83.7 (5.3)			P < .001
																								MAS- 17.7 (7.6)	15.9 (6.8)	13.7 (5.2)	19.2 (7.1)			P < .001
																								AWT- 55.6 (22.5)	52.6 (20.5)	49.9 (20.4)	60.3 (20.4)			P = .002
																								MFI- 25.0 (7.1 )	27.4 (8.0)	27.2 (9.4)	31.7 (10.6)			P = .02
																								SL- 11.7 (11.1)	15.4 (9.5)	15.7 (10.0)	25.1 (18.5)			P = .046													AST-Actual Sleep Time AWT-Actual Wake Time SE- Sleep Efficiency SL- Sleep Latency IT-Immobility Time MAS- Mean Activity Score MFI- Movement and Fragmentation Index
Effects of exercise on sleep problems in breast cancer patients receiving radiotherapy: a randomized clinical trial	Steinndorf	2017	Breast Cancer Res Treat	(1) to identify possible determinants of sleep problems in BC patients prior toradiotherapy (2) to evaluate the course of sleep problems during adjuvant radiotherapy and long-term until a 12-month follow-up (3) to assess whether an exercise intervention could affect sleep trajectories	breast cancer/ stage 0–III	>18years/ 0M + 160F	160 (80 exercise + 80 relaxation control)	RCT	?randomised	_	chemotherapy/ radiotherapy/ hormonal/ completed treatment	12 months	12 weeks	a 12-week resistance training for BC patients undergoing radiotherapy reduces sleep problems during the treatment phase but also even months after the end of cancer treatment is of high importance for many cancer patients.	2days/week	60–80% of 1RM 8 exs* 3sets* 8-12 reps	1hour/session	machine based progressive resistance exercise	relaxation control group	Performed progressive muscle relaxation according to the Jacobson method	Fatigue Assessment Questionnaire (FAQ) subscale Likert scale EORTCQLQ- C30 insomnia subscale	Quantitative- discreet	exercise significantly decreased sleep problems compared to the relaxation control group (scale: 0–100, with between-group mean differences of -10.2 (p = 0.03) from baseline to the end of radiotherapy and -10.9 (p = 0.005) to the end of the intervention), with sleep problems decreasing in the exercise group and increasing in the control group. At 12 months, differences were still observed but sta…	Hours slept during the night- 6.6 (1.2)	6.6 (1.3)	6.5 (1.6)	6.7 (1.4)	_	_	end of radiotherapy 0.03 end of intervention- 0.005	_	not reported		1. The study solely relied on self-assessment of sleep problems 2. most of the analyses focused on a global sleep problem variable that was based on a single-item question from a validated questionnaire.	unclear risk	unclear risk	unclear risk	low risk	low risk	low risk	low risk
																								Number of awakenings during the night- 2.0 (1.3)	2.1 (1.3)	2.4 (1.5)	2.4 (1.4)
																								Napping (minutes) during the day [median (Q1-Q3)]- 30 (0, 45)	15 (0, 30)	15 (0, 40)	0 (0, 33)
A non-inferiority randomized controlled trial comparing a home-based aerobic exercise program to a self-administered cognitive-behavioral therapy for insomnia in cancer patients	Mercier	2018	Sleep Research Society	to assess the efficacy of a 6-week home-based aerobic exercise program (EX) compared to that of a 6-week self-administered cognitive-behavioral therapy for insomnia (CBT-I) to improve sleep in cancer patients	all cancer and stages	18-80years/ 9M+ 32F	41 (20 exercise + 21 CBT)	pilot RCT	random permuted-block method	Investigators and research assistants were blind to the allocation sequence that was concealed in opaque and sealed envelopes	completed treatment and on hormonal therapy	6 months	6 weeks	Participants were free to choose the type of aerobic EX they wanted- including brisk walking, jogging, swimming or a combination of different aerobic exercises. Again, patients were called every week to answer their questions and to reinforce treatment adherence.	3-5days/week	moderate intensity	20-30min/session (150min/week)	aerobic exs	self administered CBT-1	self-administered treatment package composed of 60min video & 6 booklets. Each week, participants had to watch a video segment (5-20 min each) and read a booklet. CBT-I includes behavioral (stimulus control therapy, sleep restriction), cognitive (cognitive restructuring), and educational (sleep hygiene) strategies.	Insomnia Severity Index (ISI) Pittsburgh Sleep Quality Index (PSQI) Sleep diary Actigraphy.	quantitative- discreet and continuous	EX intervention was statistically inferior to CBT-I in reducing ISI scores at post-treatment but was non-inferior at follow-up. However, no significant group-by-time interaction was found on any outcome and both interventions led to a significant improvement of subjectively-assessed sleep impairments on the ISI, the Pittsburgh Sleep Quality Index (PSQI) and most sleep parameters from a daily slee…	mean (SE) ISI- 16.0 (1.3)	9.4 (1.3)	14.8 (1.1)	11.8 (1.2)	_	_		_	not reported	_	1. lack of a no-treatment control group 2. absence of statistical correction for multiple tests 3. sample was small and comprised a large proportion of women (78%) with a breast cancer diagnosis (54%), thus reducing the statistical power to detect significant differences, a problem in part circumvented by the calculation of effect sizes, and the generalization of the findings	low risk	low risk	unclear risk	low risk	low risk	low risk	high risk
																								PSQI- 11.7 (0.9)	7.6 (1.0)	12.1 (0.8)	9.3 (0.8)
																								Accelerometer-
																								SOL- 39.0 (7.0)	20.6 (5.2)	34.7 (4.5)	20.4(3.1)
																								WASO- 63.2 (11.7)	18.3 (5.8)	56.9 (9.4)	30.6 (4.3)
																								TST- 384.1 (17.9)	448.7 (8.8)	380.4 (14.7)	428.3 (14.3)
																								SE- 71.3 (3.4)	85.4 (1.9)	73.8 (2.6)	84.1 (1.7)
																								Rx- 2.1 (0.7)	1.7 (0.8)	3.0 (0.7)	2.1 (0.7)
“AeRop exercise” can improve the sleep quality of Indonesian pediatric cancer patients	Khoirrunnisa	2019		This study identified the associations between the AeRop exercise (Indonesian abbreviation of a technique combining aerobic exercise with progressive muscle relaxation) & sleep quality and fatigue of pediatric cancer patients undergoing chemotherapy	blood and solid cancers/ all stages	8-18 years/ 36M +28 F	64 (32 intervention + 32 control)	quasi-experimental pre---post study	_	_	undergoing chemotherapy	4 weeks	5 days	AeRop exercise using direct demonstration and a booklet. AeRop exercise consists of aerobic exercise and progressive muscle relaxation (PMR).	?15 min in 5 days	_	15min	combined aerobic exercise and progressive muscle relaxation technique called ‘‘AeRop exercise’’	standard care	chemotherapy and standard care	Sleep Disturbance Scale for Children	quantitative- discreet	the sleep problem scores after the AeRop exercise showed a statistically significant difference between the groups (p < 0.05)	mean difference −1.59		33.69 (3.03)	32.09 (3.14)	_	_	p<0.04	−3.14-0.05	not reported	_	1. confounding factors, such as the parents’ support, nurses’ roles, and environmental factors, were not examined 2. short intervention duration and follow up period	unclear risk	unclear risk	unclear risk	low risk	low risk	low risk	low risk
Physical Activity and Sleep Quality in Breast Cancer Survivors: A Randomized Trial	Rogers	2017	Med Sci Sports Exerc	to determine the effects of a physical activity behavior change intervention, on sleep quality in post-primary treatment breast cancer survivors	breast cancer/ stage I-IIIA	18-70 years (0M + 222F)	222M (110 -BEAT Cancer + 112- usual care)	RCT	Computer generated numbers in blocks of 4 and stratified by study site	blinding of staff during allocation	post primary treatment	6 months	3 months	12 supervised exercise sessions with exercise specialists during the first six weeks that were tapered to entirely unsupervised exercise off-site (e.g., home-based) supported by update counseling sessions with exercise specialists every two weeks.	_	≥150 weekly minutes of moderate-to-vigorous	≥150 weekly minute	Better Exercise Adherence after Treatment for Cancer (BEAT)	usual care	_	Pittsburgh Sleep Quality Index [PSQI]) and actigraphy (latency and efficiency	objective- discreet and continuous	BEAT Cancer significantly improved PSQI global sleep quality when compared with usual care at 3months (model study group effect P < .001; mean between group difference = −1.4; 95% CI = −2.1 to −0.7; P < .001) and remained statistically significant at M6 (mean between group difference = −1.0; 95% CI = −1.7 to −0.2; P = .01) No significant between group difference was noted for accelerometer latenc…	PSQI- 8.5 (3.7) accelerometer- latency- 8.9 (7.5) efficency- 83.2 (5.8)	PSQI- 7.3 (3.8) accelerometer- latency- 8.6 (7.3) efficency- 82.6 (7.2)	PSQI- 7.3 (4.1) accelerometer- latency- 9.9 (8.2) efficency- 81.6 (7.0)	PSQI- 7.6 (4.2) accelerometer- latency- 10.2 (10.3) efficency- 81.9 (6.9)	_	_	PSQI- 0.01 Accelerometer latency- .80 efficiency- .17	PSQI- (−1.7 to −0.2); Accelerometer latency- (−3.1 to 2.4) efficiency- (−2.7 to 0.5)	not reported	BEAT Cancer participants also completed 6 discussion group sessions that included topics such as exercise barriers, exercise benefits, goal setting with self-monitoring, behavioral modification strategies, safety, relapse prevention & exercise role models	1. generalizing study results to underrepresented ethnic and racial groups is limited.	low risk	low risk	high risk	low risk	low risk	low risk	low risk
TAI-CHI ARTICLES
Randomized controlled trial of Qigong/Tai Chi Easy on cancer-related fatigue in breast cancer survivors.	Larkey	2015	Ann Behav Med.	To compare a Meditative Movement practice, Qigong/Tai Chi Easy (QG/TCE), with sham Qigong (SQG), testing effects of meditation/ breath aspects of QG/TCE on breast cancer survivors' persistent fatigue and other symptoms	breast cancer survivors/ Stage 0-III	40–75 years (0M + 87 F)	87 (SQG- 45 + QG/TCE- 42)	double-blind, randomized controlled trial	stratified randomization	participants were blinded	post primary treatment	12 weeks	3 months	The QG/TCE classes were taught by a nurse	5days/week supervised 2days/week	low-intensity	30min/session supervised 60min/day	quigong/tai chi	sham quigong	SQG was taught by an exercise physiologist	PSQI	objective- discreet	there was no significant differences between the QG/TCE versus SQG groups' responses to the interventions across time.	10.0 (3.85)	6.3 (3.00)	9.9 (4.77)	7.7 (4.94)	_	_	0.27	_	not reported		1. positive results on outcomes from pre- to post-intervention could be explained by maturation effects 2. contrast between the two interventions may have not been enough.	Low risk	unclear	low risk	low risk	low risk	low risk	high risk
Tai Chi Chih Compared With Cognitive Behavioral Therapy for the Treatment of Insomnia in Survivors of Breast Cancer: A Randomized, Partially Blinded, Noninferiority Trial (vol 35, pg 2656, 2017)	Irwin	2017	JOURNAL OF CLINICAL ONCOLOGY	to evaluate whether TCC is noninferior to CBT-I for the treatment of insomnia in survivors of breast cancer.	breast cancer survivors/ Stage 0-III	42 to 83 years ( 0M + 90F)	90 (45 TCC + 45 CBT-1)	A Randomized, Partially Blinded, Noninferiority Trial	computerized random number generator in blocks of 7 to 10	no research staff had access to allocation sequence, which was on sequentially numbered, opaque, and sealed envelopes	completed treatment	3 months	3 months	delivered to groups of 7 to 10 in weekly 120 sessions. administered over 2 months, followed by 1 month of skill consolidation and adherence, for 3 months of treatment exposure.	_	_	120min/week	tai chi chih (TCC)	CBT-1	CBT-1 was extended to 3 months with 1 month of skill consolidation and adherence. delivered to groups of 7 to 10 participants in weekly 120-minute sessions	PSQI and Athens Insomnia Severity Index [AISI])	objective- discree		?difference in change only has been reported								no adverse events		1. All participants were white and well educated 2, Significant drop out rate in TCC	Low risk	low risk	low risk	low risk	low risk	low risk	low risk
Qigong/tai chi for sleep and fatigue in prostate cancer patients undergoing radiotherapy: A randomized controlled trial.	McQuade	2017	Psychooncology.	to examine the effects of incorporating a qigong/tai chi (QGTC) program alongside radiotherapy	rectal, anal, prostate cancer/ 1-3 stages	>18years (76M + 0F)	90 (26 Quigong + 26 light exs + 24 waitlist)	RCT	adaptive randomization called minimization.	_	radiotherapy	3 Months	7-8 weeks	Classes were conducted one-on-one or with one or two other patients based on scheduling. Patients were given a DVD and printed instructional materials and encouraged to practice up to daily on their own	3days/week	_	40min/session	Qigong/Tai Chi program (QGTC)	light exercise program waitlist program	light exs program-Resistance training employed a combination of 3 levels of resistance tubes and the focus is on lighter tension and more repetition (8–12 per set). Waitlist program	PSQI	quantitative- discreet	QGTC group reported longer sleep duration at mid-XRT (QGTC=7.01 hours; LE=6.42; WL=6.50; p=0.05) but this difference did not persist over time. There were no group differences in other domains of sleep or fatigue	6.85 (0.76)	5.16 (0.52)	5.58 (0.78)	5.33 (0.63)	6.58 (0.69)	5.77 (0.50)	>0.05		not reported		1, small sample size 2, use of self reported measures	Low risk	unclear	low risk	low risk	low risk	low risk	low risk
