# Supplementary material for: Effect of exercise based interventions on sleep and circadian rhythm in cancer survivors—a systematic review and meta-analysis
Source: PeerJ journal article supplement (doi:10.7717/peerj.17053), 2024-03-08
Supplement: Tai_chi_studies.pdf [file Tai_chi_studies.pdf]

|              | Random sequence generation (selection bias) | Allocation concealment (selection bias) | Blinding of participants and personnel (performance bias) | Blinding of outcome assessment (detection bias) | Incomplete outcome data (attrition bias) | Selective reporting (reporting bias) | Other bias |
|--------------|---------------------------------------------|-----------------------------------------|-----------------------------------------------------------|-------------------------------------------------|------------------------------------------|--------------------------------------|------------|
| Irwin 2017   | +                                           | +                                       | +                                                         | +                                               | +                                        | +                                    | +          |
| Larkey 2015  | +                                           | ?                                       | +                                                         | +                                               | +                                        | +                                    | -          |
| Lu 2019      | +                                           | +                                       | +                                                         | +                                               | +                                        | +                                    | +          |
| Mcquade 2017 | +                                           | ?                                       | +                                                         | +                                               | +                                        | +                                    | +          |

**S-1e** Risk of bias of Tai chi studies
