# Supplementary material for: Effect of exercise based interventions on sleep and circadian rhythm in cancer survivors—a systematic review and meta-analysis
Source: PeerJ journal article supplement (doi:10.7717/peerj.17053), 2024-03-08
Supplement: Yoga_studies.pdf [file Yoga_studies.pdf]

|                  | Random sequence generation (selection bias) | Allocation concealment (selection bias) | Blinding of participants and personnel (performance bias) | Blinding of outcome assessment (detection bias) | Incomplete outcome data (attrition bias) | Selective reporting (reporting bias) | Other bias |
|------------------|---------------------------------------------|-----------------------------------------|-----------------------------------------------------------|-------------------------------------------------|------------------------------------------|--------------------------------------|------------|
| Chandwani 2014   | +                                           | ?                                       | -                                                         | +                                               | +                                        | +                                    | +          |
| Chaoul 2018      | +                                           | ?                                       | -                                                         | +                                               | +                                        | +                                    | +          |
| Cohen 2004       | +                                           | +                                       | +                                                         | +                                               | +                                        | +                                    | +          |
| Cramer 2016      | +                                           | +                                       | ?                                                         | +                                               | +                                        | +                                    | -          |
| Huberty 2019     | ?                                           | ?                                       | -                                                         | +                                               | +                                        | +                                    | +          |
| Mustain 2013     | +                                           | +                                       | +                                                         | +                                               | +                                        | +                                    | +          |
| Raghavendra 2009 | +                                           | +                                       | ?                                                         | ?                                               | +                                        | +                                    | +          |
| Taylor 2018      | ?                                           | +                                       | +                                                         | +                                               | +                                        | +                                    | -          |

**S-1f** Risk of bias of yoga studies
